# Supplementary material for: Creation of a Biobank of the Sperm of the Honey Bee Drones of Different Subspecies of Apis mellifera L
Source: Animals (Basel). 2023 Nov 28;13(23):3684. doi: 10.3390/ani13233684 (PMC10705684; doi:10.3390/ani13233684)
Supplement: Supplementary file 1 [file animals-13-03684-s001.zip › Figure S1.pdf]

Figure S1 The studied morphometric parameters

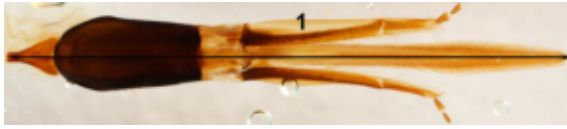

(1) proboscis length  $L_x$

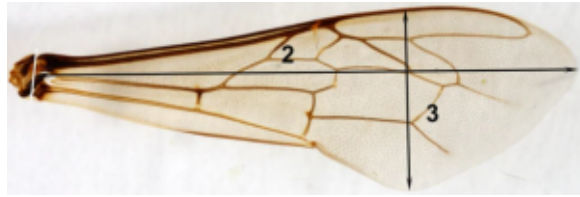

(2) fore wing length  $F_L$  and (3) width  $F_W$

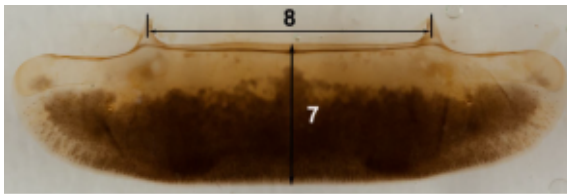

(7) length  $L_{t3}$  and (8) width  $W_{t3}$  of third tergite

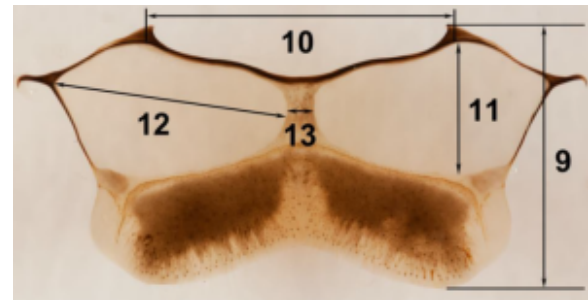

(9) length of third sternite  $L_{s3}$ , (10) width of third sternite (this parameter was not used), (11) length  $L_{wm}$  and (12) width  $W_{wm}$  of wax mirror, (13) distance between wax mirrors  $L_{wmd}$

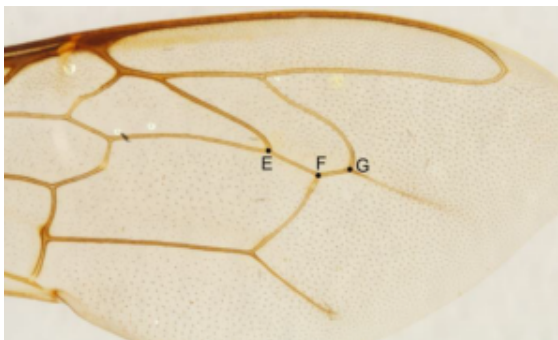

Linear dimensions EF and FG for CI assessment ( $EF/FG \times 100\% = CI$ )

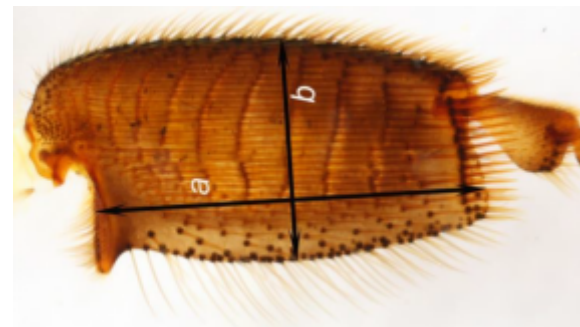

Linear dimensions  $a$  (length) and  $b$  (width) on the first tarsal segment of the right hind leg for TI assessment ( $b/a \times 100\% = TI$ )
